# Supplementary material for: Dihydroartemisinin triggers ferroptosis in primary liver cancer cells by promoting and unfolded protein response-induced upregulation of CHAC1 expression
Source: PubMed Central journal article supplement — Oncol Rep. 2021 Sep 23;46(5):240. doi: 10.3892/or.2021.8191 (PMC8485000; doi:10.3892/or.2021.8191), 2021-09-23

Figure S1. Determination of transfection efficiency using western blotting or RR-qPCR. PLC cells were transfected with the indicated siRNAs or overexpression plasmids. The expression levels of the indicated factors were analyzed by western blotting or RT-qPCR in (A) PLC/PRF/5 and (B) HepG2 cells. RT-qPCR, reverse transcription-quantitative PCR; PLC, primary liver cancer; siRNA, small interfering RNA. siRNA, small interfering RNA; NC, negative control; ATF, activating transcription factor; XBP1, X box-binding protein 1; sXBP1, spliced form of XBP1; unXBP1, unspliced form of XBP1; p-, phosphorylated; t-, total; CHAC, ChaC Glutathione Specific  $\gamma$ -Glutamylcyclotransferase.

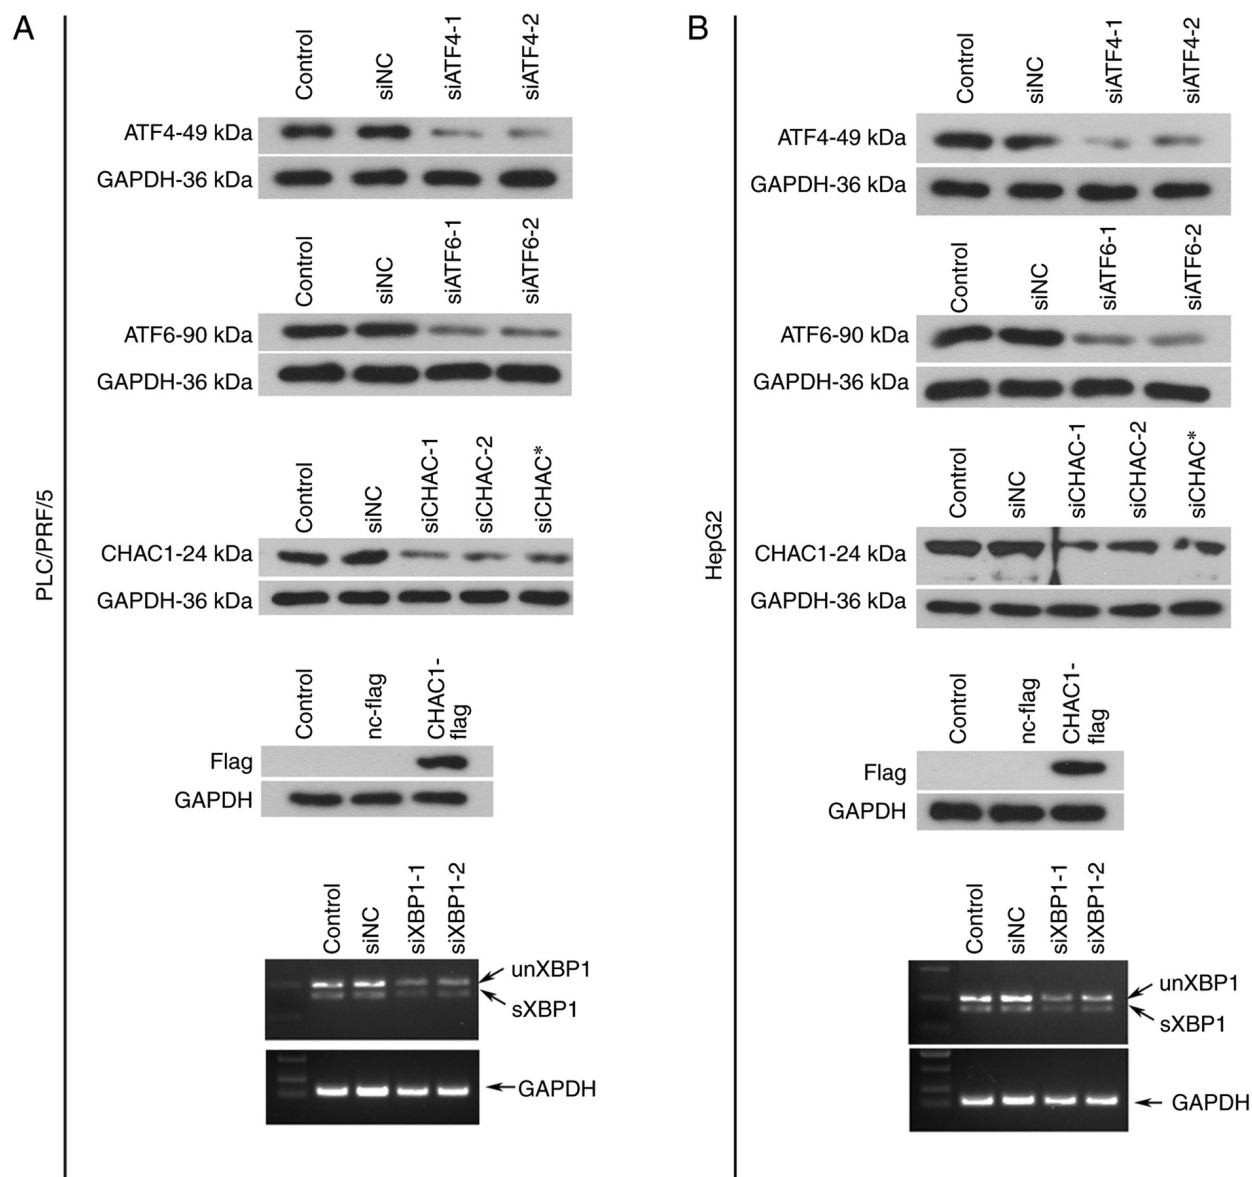

Supplement: Supplementary_Data.pdf [file Supplementary_Data.pdf]
